# Supplementary material for: Vglut2-based glutamatergic signaling in central noradrenergic neurons is dispensable for normal breathing and chemosensory reflexes
Source: eLife. 2024 Sep 17;12:RP88673. doi: 10.7554/eLife.88673 (PMC11407767; doi:10.7554/eLife.88673)
Supplement: Figure 1—source data 1. [file elife-88673-fig1-data1.xlsx]

## Sheet: Sheet1
Mouse ID	M35559				Male
NA nucleus	The number of GFP+ cells/ brain section	The number of tdTomato+ cells/ brain section	The number of NA neurons in total/ brain section	GFP+/GFP+ + tdTomato+ (%)
	(NA neurons co-expressing Vglut2)	(NA neurons without Vglut2 co-expression)		(Percentage of NA neurons co-expressing Vglut2)
A7	10	6	16
	8	7	15
	12	9	21
	13	7	20
	12	4	16
Total number of cells	55	33	88	62.5
Locus Coeruleus	39	6	45
	68	25	93
	27	3	30
	47	11	58
	81	18	99
	131	32	163
	138	50	188
	129	53	182
Total number of cells	660	198	858	76.9231
A5	15	0	15
	12	0	12
	16	0	16
	8	0	8
Total number of cells	51	0	51	100
Sub CD/CV	9	8	17
	8	5	13
	4	8	12
	6	7	13
	12	14	26
Total number of cells	39	42	81	48.1481
Anterior C1/A1	19	0	19
	6	0	6
	18	2	20
	24	0	24
	18	0	18
Total number of cells	85	2	87	97.7011
Anterior C2/A2	7	0	7
	4	0	4
	20	0	20
Total number of cells	31	0	31	100
Posterior C1/A1	5	3	8
	11	2	13
	21	0	21
	16	0	16
Total number of cells	53	5	58	91.3793
Posterior C2/A2	106	3	109
	33	2	35
Total number of cells	139	5	144	96.5278
C3	1	0	1
	3	0	3
	2	0	2
	1	0	1
Total number of cells	7	0	7	100
Mouse ID	M42648				Female
NA nucleus	The number of GFP+ cells/ brain section	The number of tdTomato+ cells/ brain section	The number of NA neurons in total/ brain section	GFP+/GFP+ + tdTomato+ (%)
	(NA neurons co-expressing Vglut2)	(NA neurons without Vglut2 co-expression)		(Percentage of NA neurons co-expressing Vglut2)
A7	7	0	7
	9	0	9
	12	0	12
	10	6	16
Total number of cells	38	6	44	86.3636
Locus Coeruleus	7	1	8
	8	1	9
	18	2	20
	11	1	12
	12	1	13
	15	2	17
	37	3	40
	37	9	46
	56	7	63
	60	7	67
	92	14	106
Total number of cells	353	48	401	88.0299
A5	6	1	7
	3	0	3
	4	1	5
	4	1	5
	6	2	8
	0	3	3
	4	8	12
Total number of cells	27	16	43	62.7907
Sub CD/CV	11	1	12
	9	5	14
	6	5	11
	15	13	28
	32	11	43
	12	14	26
	5	0	5
	4	1	5
	0	5	5
	0	7	7
	4	13	17
Total number of cells	98	75	173	56.6474
Anterior C1/A1	4	0	4
	2	0	2
	4	0	4
	4	0	4
	5	0	5
	15	0	15
Total number of cells	34	0	34	100
Anterior C2/A2	5	0	5
	7	1	8
	7	0	7
	8	0	8
	14	0	14
	8	0	8
	6	0	6
	5	2	7
	12	0	12
	11	2	13
Total number of cells	83	5	88	94.3182
Posterior C1/A1	18	0	18
	12	0	12
	29	1	30
	22	0	22
	18	0	18
	5	0	5
	14	0	14
	17	0	17
	19	0	19
	21	0	21
	21	0	21
	31	0	31
	23	0	23
	13	0	13
	19	0	19
	13	0	13
Total number of cells	295	1	296	99.6622
Posterior C2/A2	13	0	13
	31	0	31
	79	1	80
	86	2	88
	93	6	99
	124	7	131
	141	3	144
	133	4	137
	85	1	86
	76	0	76
	58	0	58
	65	0	65
	44	1	45
	35	0	35
	19	0	19
Total number of cells	1082	25	1107	97.7416
C3	1	0	1
	1	0	1
	3	0	3
	1	0	1
	4	0	4
	2	0	2
	3	0	3
	1	0	1
	1	0	1
	1	0	1
Total number of cells	18	0	18	100
Mouse ID	M45441				Female
NA nucleus	The number of GFP+ cells/ brain section	The number of tdTomato+ cells/ brain section	The number of NA neurons in total/ brain section	GFP+/GFP+ + tdTomato+ (%)
	(NA neurons co-expressing Vglut2)	(NA neurons without Vglut2 co-expression)		(Percentage of NA neurons co-expressing Vglut2)
A7	5	4	9
	11	7	18
	10	4	14
	3	2	5
	6	3	9
	2	5	7
	3	1	4
Total number of cells	40	26	66	60.6061
Locus Coeruleus	3	1	4
	10	3	13
	8	5	13
	26	7	33
	30	7	37
	32	11	43
	46	14	60
	68	36	104
	84	32	116
	77	34	111
	83	22	105
	80	19	99
	74	15	89
	59	9	68
	40	9	49
	18	3	21
Total number of cells	738	227	965	76.4767
A5	9	0	9
	4	1	5
	3	1	4
	4	0	4
	5	0	5
	8	1	9
Total number of cells	33	3	36	91.6667
Sub CD/CV	5	4	9
	6	4	10
	4	0	4
	2	9	11
	4	2	6
	13	14	27
	17	15	32
	20	16	36
	14	22	36
	0	2	2
	0	3	3
	4	1	5
	3	1	4
Total number of cells	92	93	185	49.7297
Anterior C1/A1	25	0	25
	14	0	14
	11	0	11
	16	0	16
	12	0	12
	6	0	6
	13	0	13
	16	0	16
	6	0	6
	12	1	13
	3	0	3
	11	0	11
Total number of cells	145	1	146	99.3151
Anterior C2/A2	5	0	5
	7	1	8
	14	0	14
	7	0	7
	4	0	4
	6	0	6
	8	1	9
	10	2	12
Total number of cells	61	4	65	93.8462
Posterior C1/A1	13	0	13
	18	1	19
	10	0	10
	9	1	10
	4	0	4
	15	0	15
	3	0	3
	4	1	5
Total number of cells	76	3	79	96.2025
Posterior C2/A2	23	0	23
	37	0	37
	51	0	51
	47	0	47
	40	1	41
	51	0	51
	85	2	87
	80	0	80
	52	1	53
	27	0	27
Total number of cells	493	4	497	99.1952
C3	2	0	2
	1	0	1
	1	0	1
	3	0	3
	1	0	1
	4	0	4
	2	0	2
	5	0	5
	1	0	1
Total number of cells	20	0	20	100
Summary	A7	Locus Coeruleus	A5	Sub CD/CV	Anterior C1/A1	Anterior C2/A2	Posterior C1/A1	Posterior C2/A2	C3
	62.5	76.9231	100	48.1481	97.7011	100	91.3793	96.5278	100
	86.3636	88.0299	62.7907	56.6474	100	94.3182	99.6622	97.7416	100
	60.6061	76.4767	91.6667	49.7297	99.3151	93.8462	96.2025	99.1952	100
Mean	69.8232	80.4766	84.8191	51.5084	99.0054	96.0548	95.748	97.8215	100
SD	14.3557	6.54521	19.5269	4.52019	1.1803	3.4248	4.16009	1.33549	0
SEM	8.28825	3.77888	11.2739	2.60973	0.681444	1.97731	2.40183	0.771045	0
n	3	3	3	3	3	3	3	3	3
