# Supplementary material for: Vglut2-based glutamatergic signaling in central noradrenergic neurons is dispensable for normal breathing and chemosensory reflexes
Source: eLife. 2024 Sep 17;12:RP88673. doi: 10.7554/eLife.88673 (PMC11407767; doi:10.7554/eLife.88673)
Supplement: Figure 1—source data 2. [file elife-88673-fig1-data2.xlsx]

## Sheet: Sheet1
Mouse ID	M40586				Female
NA nucleus	The number of GFP+ cells/ brain section	The number of tdTomato+ cells/ brain section	The number of NA neurons in total/ brain section	GFP+/GFP+ + tdTomato+ (%)
	(NA neurons co-expressing Vglut3)	(NA neurons without Vglut3 co-expression)		(Percentage of NA neurons co-expressing Vglut3)
Posterior C1/A1	0	19	19
	0	31	31
	0	36	36
	0	11	11
	0	22	22
	2	38	40
	0	30	30
	0	14	14
	0	22	22
	0	12	12
	0	8	8
	0	10	10
	0	17	17
	0	11	11
	0	9	9
Total number of cells	2	290	292	0.684932
Posterior C2/A2	1	11	12
	17	39	56
	23	50	73
	49	41	90
	38	41	79
	38	66	104
	28	81	109
	34	71	105
	40	91	131
	27	51	78
	32	59	91
	17	51	68
	6	35	41
	3	42	45
Total number of cells	353	729	1082	32.6248
Mouse ID	M41078				Male
NA nucleus	The number of GFP+ cells/ brain section	The number of tdTomato+ cells/ brain section	The number of NA neurons in total/ brain section	GFP+/GFP+ + tdTomato+ (%)
	(NA neurons co-expressing Vglut3)	(NA neurons without Vglut3 co-expression)		(Percentage of NA neurons co-expressing Vglut3)
Posterior C1/A1	0	15	15
	0	5	5
	0	13	13
	0	11	11
	0	13	13
	0	15	15
	0	18	18
	0	15	15
	0	10	10
	0	7	7
	0	6	6
	1	9	10
Total number of cells	1	137	138	0.724638
Posterior C2/A2	2	29	31
	5	38	43
	10	35	45
	10	31	41
	14	36	50
	11	30	41
	12	37	49
	10	44	54
	12	50	62
	18	37	55
	12	31	43
	0	20	20
Total number of cells	116	418	534	21.7228
Mouse ID	M44597				Male
NA nucleus	The number of GFP+ cells/ brain section	The number of tdTomato+ cells/ brain section	The number of NA neurons in total/ brain section	GFP+/GFP+ + tdTomato+ (%)
	(NA neurons co-expressing Vglut3)	(NA neurons without Vglut3 co-expression)		(Percentage of NA neurons co-expressing Vglut3)
Posterior C1/A1	1	25	26
	0	21	21
	0	19	19
	0	14	14
	0	24	24
	1	17	18
	1	10	11
	0	13	13
	1	9	10
	0	20	20
	1	18	19
	0	21	21
	0	10	10
	1	14	15
	0	11	11
Total number of cells	6	246	252	2.38095
Posterior C2/A2	0	15	15
	1	9	10
	0	11	11
	3	4	7
	3	31	34
	9	43	52
	25	47	72
	27	60	87
	22	53	75
	23	70	93
	24	61	85
	35	50	85
	25	54	79
	13	45	58
	6	53	59
Total number of cells	216	606	822	26.2774
Summary	Posterior C1/A1	Posterior C2/A2
	0.684932	32.6248
	0.724638	21.7228
	2.38095	26.2774
Mean	1.26351	26.875
SD	0.96794	5.47548
SEM	0.55884	3.16127
n	3	3
