# Supplementary material for: Vglut2-based glutamatergic signaling in central noradrenergic neurons is dispensable for normal breathing and chemosensory reflexes
Source: eLife. 2024 Sep 17;12:RP88673. doi: 10.7554/eLife.88673 (PMC11407767; doi:10.7554/eLife.88673)
Supplement: Figure 2—source data 1. [file elife-88673-fig2-data1.xlsx]

## Sheet: Sheet1
Mouse ID	M42248			Female
NA nucleus	The number of Vglut2+ DBH+ cells/ brain section	The number of DBH+ cells/ brain section	Vglut2+DBH+/ DBH+ (%)
	(NA neurons co-expressing Vglut2)	(NA neurons in total)	(Percentage of NA neurons co-expressing Vglut2)
Anterior C1/A1	8	8
	13	15
	7	21
	7	13
	9	14
	8	15
	21	22
	6	8
	19	22
	11	12
	13	15
	11	11
	13	15
	6	8
	10	13
	7	11
	7	14
	10	11
	6	9
	8	13
	5	8
	6	10
	10	12
Total number of cells	221	300	73.6667
Anterior C2/A2	6	7
	16	19
	2	3
	5	7
	2	3
	5	8
	2	6
	4	12
	8	11
Total number of cells	50	76	65.7895
Posterior C1/A1	14	25
	6	9
	3	8
	7	8
	4	12
	0	6
	2	14
	7	16
	1	17
	2	15
	3	18
	2	10
	4	7
	1	9
	0	7
	0	7
Total number of cells	56	188	29.7872
Posterior C2/A2	9	22
	13	26
	29	35
	43	48
	58	63
	60	61
	70	74
	82	85
	67	71
	125	146
	138	142
	72	72
	83	98
	55	58
	87	93
	56	58
	42	46
	26	31
	16	18
Total number of cells	1131	1247	90.6977
C3	1	1
	3	3
	1	1
	3	4
	3	3
	2	4
	0	1
Total number of cells	13	17	76.4706
Mouse ID	M42247			Female
NA nucleus	The number of Vglut2+ DBH+ cells/ brain section	The number of DBH+ cells/ brain section	Vglut2+DBH+/ DBH+ (%)
	(NA neurons co-expressing Vglut2)	(NA neurons in total)	(Percentage of NA neurons co-expressing Vglut2)
Anterior C1/A1	9	9
	7	8
	12	12
	7	8
	18	18
	12	13
	19	20
	16	16
	14	18
	22	23
	8	9
	9	12
	6	6
	10	11
	9	11
	11	20
	4	9
	16	16
	14	16
	17	19
	12	17
	18	19
Total number of cells	270	310	87.0968
Anterior C2/A2	2	2
	0	2
	1	2
	4	4
	2	2
	6	8
	4	5
	0	1
	2	3
	6	8
	6	6
	1	6
	22	23
	1	4
	2	5
	6	8
	10	15
	4	14
Total number of cells	79	118	66.9492
Posterior C1/A1	14	18
	5	12
	16	18
	6	9
	10	16
	7	15
	4	20
	5	12
	7	19
	2	16
	10	19
	3	8
	1	8
	3	18
	3	10
	1	18
	1	14
	0	8
Total number of cells	98	258	37.9845
Posterior C2/A2	4	17
	19	29
	44	54
	57	68
	66	69
	100	102
	106	106
	132	137
	83	110
	80	91
	111	113
	79	84
	46	53
	55	80
	15	44
	22	32
	16	18
	14	19
Total number of cells	1049	1226	85.5628
C3	0	2
	1	1
	4	4
	1	1
	1	1
	5	5
	2	2
Total number of cells	14	16	87.5
Mouse ID	M42251			Male
NA nucleus	The number of Vglut2+ DBH+ cells/ brain section	The number of DBH+ cells/ brain section	Vglut2+DBH+/ DBH+ (%)
	(NA neurons co-expressing Vglut2)	(NA neurons in total)	(Percentage of NA neurons co-expressing Vglut2)
Anterior C1/A1	8	8
	11	11
	20	20
	26	27
	15	16
	21	22
	14	14
	15	16
	19	19
	17	17
	9	10
	7	9
	14	18
	10	10
	13	13
	14	16
	10	12
	15	16
	13	13
	10	10
	18	20
	9	10
	12	12
	21	23
	13	17
Total number of cells	354	379	93.4037
Anterior C2/A2	5	7
	7	7
	4	4
	7	8
	12	16
	3	3
	6	7
	1	4
	9	13
	1	8
	1	5
	5	8
	4	10
	4	7
	4	5
	7	9
	7	12
	9	11
	9	15
	19	28
Total number of cells	124	187	66.3102
Posterior C1/A1	6	8
	6	7
	16	19
	6	14
	8	9
	1	8
	4	10
	5	8
	5	17
	7	18
	0	12
	1	16
	1	9
	5	17
	2	13
Total number of cells	73	185	39.4595
Posterior C2/A2	58	62
	55	60
	72	72
	84	84
	67	67
	98	106
	104	104
	85	88
	142	149
	113	119
	109	116
	59	63
	25	36
	25	36
	14	19
Total number of cells	1110	1181	93.9881
C3	1	1
	0	1
	0	1
	1	1
	2	2
	3	3
	2	3
	1	1
	1	1
	1	2
Total number of cells	12	16	75
Summary	Anterior C1/A1	Anterior C2/A2	Posterior C1/A1	Posterior C2/A2	C3
	73.6667	65.7895	29.7872	90.6977	76.4706
	87.0968	66.9492	37.9845	85.5628	87.5
	93.4037	66.3102	39.4595	93.9881	75
Mean	84.7224	66.3496	35.7437	90.0829	79.6569
SD	10.0805	0.580844	5.21093	4.24618	6.83204
SEM	5.81996	0.335351	3.00853	2.45153	3.94448
n	3	3	3	3	3
