# Supplementary material for: Vglut2-based glutamatergic signaling in central noradrenergic neurons is dispensable for normal breathing and chemosensory reflexes
Source: eLife. 2024 Sep 17;12:RP88673. doi: 10.7554/eLife.88673 (PMC11407767; doi:10.7554/eLife.88673)
Supplement: Figure 2—source data 2. [file elife-88673-fig2-data2.xlsx]

## Sheet: Sheet1
Mouse ID	M42250			Male
NA nucleus	The number of Vglut3+ DBH+ cells/ brain section	The number of DBH+ cells/ brain section	Vglut3+DBH+/ DBH+ (%)
	(NA neurons co-expressing Vglut3)	(NA neurons in total)	(Percentage of NA neurons co-expressing Vglut3)
Posterior C2/A2	10	51
	12	68
	26	74
	32	77
	34	83
	17	79
	18	92
	6	92
	29	86
	14	60
	17	63
	4	44
	2	34
	0	23
	0	16
Total number of cells	221	942	23.4607
Mouse ID	M42251			Male
NA nucleus	The number of Vglut3+ DBH+ cells/ brain section	The number of DBH+ cells/ brain section	Vglut3+DBH+/ DBH+ (%)
	(NA neurons co-expressing Vglut3)	(NA neurons in total)	(Percentage of NA neurons co-expressing Vglut3)
Posterior C2/A2	4	20
	3	40
	10	68
	16	67
	28	88
	34	94
	26	84
	33	111
	36	119
	46	130
	28	92
	37	105
	27	71
	20	79
	8	43
	1	29
	0	21
	1	17
Total number of cells	358	1278	28.0125
Mouse ID	M42249			Female
NA nucleus	The number of Vglut3+ DBH+ cells/ brain section	The number of DBH+ cells/ brain section	Vglut3+DBH+/ DBH+ (%)
	(NA neurons co-expressing Vglut3)	(NA neurons in total)	(Percentage of NA neurons co-expressing Vglut3)
Posterior C2/A2	7	36
	12	65
	20	59
	28	49
	22	57
	8	60
	22	72
	21	57
	18	83
	20	61
	24	95
	21	57
Total number of cells	223	751	29.6937
Summary	Posterior C2/A2
	23.4607
	28.0125
	29.6937
Mean	27.0557
SD	3.2248
SEM	1.86184
n	3
