# Supplementary material for: Vglut2-based glutamatergic signaling in central noradrenergic neurons is dispensable for normal breathing and chemosensory reflexes
Source: eLife. 2024 Sep 17;12:RP88673. doi: 10.7554/eLife.88673 (PMC11407767; doi:10.7554/eLife.88673)
Supplement: Figure 3—source data 1. [file elife-88673-fig3-data1.xlsx]

## Sheet: Sheet1
	Intensity mean of Slc17a6 (Vglut2) mRNA signal in DBH+ neurons											Vglut2 intensity in DBH+ neurons
	Group 1			Group 2			Group 3					Control	Dbh-Cre; Vglut2 cKO
Mouse ID	M40795	M40794		M44558	M40797		M43874	M40798			Group 1	914.933	73.3435
	Control	Dbh-Cre; Vglut2 cKO		Control	Dbh-Cre; Vglut2 cKO		Control	Dbh-Cre; Vglut2 cKO			Group 2	533.727	12.2402
	96.1992	0		1061.3	0		262.601	0			Group 3	555.26	3.03486
	247.399	0		322.3	0		406.601	0
	649.8	0		385	292.3		59.9004	0				Relative Vglut2 intensity in DBH+ neurons (normalized to control)
	399.1	0		682.699	0		761.4	60.5996				Control	Dbh-Cre; Vglut2 cKO
	134	0		453.8	0		234.9	19.2002			Group 1	1.64776	0.132089
	580.399	389.4		647.6	0		504.2	0			Group 2	0.961219	0.0220442
	674.7	0		701.899	0		379.9	0			Group 3	1	0.00546566
	242.8	93.1006		1223.6	0		302	0			Average		0.0531995
	616.899	34.3669		864.5	0		766.5	0			SD		0.0688211
	297.6	21.0671		585.699	0		32.1006	0			SEM		0.0397339
	393.399	113.067		818	0		83.2002	0
	257.699	126.867		1299.5	0		304.2	0			The decreased Vglut2 signal in mutant brains compared to controls (%)
	446.899	0		1006.5	0		115.7	0			94.6801
	476.5	0		2040.1	0		126.601	0
	214.5	177.433		354.5	0		1008.3	0
	848.199	0		598	0		3.59961	0
	1380.1	0		319.101	0		391.1	0
	448.1	0		108.4	0		128.1	0
	357.3	0		345.301	0		370.5	0
	1031.4	0		320.5	0		540.1	0
	669.2	0		473.2	275.8		1121.3	0
	910.5	0		116.4	0		643.5	0
	1731.5	0		196.9	0		871.4	0
	484.4	0		693.399	0		61.7998	55.2998
	1131.7	0		496.5	0		201.8	0
	523.399	0		1338.2	0		98.0996	0
	189.6	0		20.0996	0		0	0
	371	0		1577.3	0		347.1	0
	458.5	0		350.3	21.5996		253.1	0
	655.6	234.366		291.1	0		263.2	0
	1583.4	5.86621		50.5	0		243.3	0
	1611.5	831.066		884.8	0		670.6	0
	708.7	315.167		614.7	65.8994		379.2	0
	441.5	124.967		0	0		416.9	0
	526.2	229.566		423.301	45.5		381.9	0
	845.8	389.066		153.801	0		209.5	0
	694.8	169.767		751	0		306.601	0
	1242.6	738.967		10.6006	0		466.8	0
	1871.3	377.967		100.2	0		866.7	0
	558.4	324.667		686.5	0		1041	0
	1478.1	522.866		175.7	0		659.4	0
	993.7	347.866		50.5996	0		335.3	0
	1320.5	143.167		84.3994	0		681.4	0
	690.3	246.366		67.7002	0		819.2	0
	1491.8	0		18.5	0		299.7	0
	1299.3	0		576	0		181.3	0
	1586.2	0		23.3994	0		841.7	0
	1176.6	0		377.5	0		640.101	0
	1369.7	0		309.7	0		311.5	0
	661.9	0		32.7002	0		1236.9	0
	2057.1	0		0	0		492	0
	1412.3	0		111.5	0		136.7	0
	872.4	908.566		395.4	0		283.3	0
	1771.9	0		543.9	0		2383.8	0
	1841.1	0		402.2	0		341.9	0
	469	0		479.5	0		489.5	0
	343.7	0		275.899	0		803.5	0
	937.7	0		181.2	0		618.101	0
	1058.7	0		248.2	0		260.2	90.9004
	1385.8	135.8		295.3	0		1044.4	0
	1446.1	0		460.399	0		1652.2	0
	1249.4	30.7002		267.3	0		112.2	0
	1382.6	0		529.2	0		475.4	0
	902.4	86.9004		556.6	0		707.5	0
	400	0		277.399	0		277.101	0
	1135	0		371.6	0		712.7	0
	601.3	0		929.8	0		416.199	0
	687.7	0		388.2	0		407.4	0
	1713.8	0		260.5	0		1079.4	0
	1894.7	0		244.399	0		805.8	0
	884.9	0		783.5	0		827.7	0
	1572.4	0		160.3	0		1703.1	0
	1699.4	0		294.3	0		905.3	55.8994
		19.7998		41.2998	0		696.3	0
		0		453	0		1263	0
		0		61.7998	0		1306.2	33.3994
		0		87.3994	0		901.6	0
		48.9004		357.7	0		398	0
		0		627.5	0		740.4	0
		0		667.7	0		460	0
		0		2803	23.2998		1029.6	40.8994
		0		566.899	0		290.5	0
		0		1140.6	0		471.3	0
		0		445.3	0		1761.6	0
		0		488.399	0		1881.5	11
		0		391.7	0		836.2	0
		0		193.399	0		465.6	0
		0		404.3	0		156.4	0
		0		998.3	0		570.2	0
		0		1691.2	0		328.3	0
		0		296.9	0.799805		1117.7	0
		0		0	0		489.1	0
		0		563.3	0		2190.7	0
		0		758.7	0		1193.2	0
		0		323.8	0		526.7	5.90039
		0		835	0		108.8	0
		0		575.7	0		171.1	0
		0		611.4	0		674.1	0
Average	914.933	73.3435		380.5	0		875.899	0
				656.7	0		1039.9	0
				270.7	0		707.8	0
				393.6	0		89.5	0
				325.2	0		804.899	0
				292.3	0		547.399	0
				343.8	0		1362.7	0
				344.1	0		478.8	0
				748	0		483.6	0
				704.4	0		784.699	0
				530.5	0		1191.2	0
				866.7	0		638.3	0
				519.9	0		708.8	0
				584.6	0		653	0
				756.5	0		569.199	0
				717.4	0		291.3	0
				0	0		403.8	0
				66	0		238.101	0
				474.899	0		489.301	88.2002
				1569.9	0		412	0
				224.399	0		529.7	0
				197.6	0		84.5	0
				942.199	0		524	0
				150	0		188.6	0
				190.5	0		236.899	0
				626.399	0		60.5	0
				302.899	0		367.7	0
				494.5	0		178.1	0
				2816.7	0		538.6	0
				453.699	285.5		405.6	0
				628.5	0		0	0
				486.399	319.7		469.5	0
				131	0		524.8	0
				134.6	0		1071.5	0
				450.399	0		114.899	0
				371.5	0		0	0
				863.399	0		188.5	0
				125.6	0		457.6	0
				327.199	0		56.5	0
				853.6	0		487.899	0
				687.199	0		233	0
				902	0		628.3	0
				197.8	0		675.1	0
				169	0		298.6	0
				383.199	0		366.8	0
				1011	0		165.899	0
				353.899	0		1097.2	0
				1567.4	0		529.7	0
				477.899	371.101		278.3	0
				383.399	0		530.1	0
				381.899	0		587.5	0
				847.699	0		47.5996	0
				33.0996	0			0
				284.199	0			0
				778.6	0	Average	555.26	3.03486
				228.6	0
				738.899	0
				593.3	0
				842.1	0
				289.899	0
				378.2	367.101
				364	0
				304.1	0
				294.7	0
				461.2	0
				469.399	0
				556.1	0
				293.899	0
				456.3	0
				1095.4	0
				224.899	0
				807.2
				1172.9
				310.8
				2991.6
				693.7
				371.2
				253.7
				286
				404.8
				737.7
				454.6
				259.5
				824
				234.3
				1451.8
				249.5
				550.3
				759.399
				1332.8
				405.7
				733.5
				685.7
				316.3
				327.2
				967.1
				71.5996
				499.5
				772.899
				462.3
			Average	533.727	12.2402
